# Supplementary material for: Enhancing antioxidant properties of CeO2 nanoparticles with Nd3+ doping: structural, biological, and machine learning insights
Source: Royal Society of Chemistry journal article supplement (doi:10.1039/d3bm02107f), 2024-01-01
Supplement: d3bm02107f1.pdf [file d3bm02107f1.pdf]

## Enhancing Antioxidant Properties of CeO<sub>2</sub> Nanoparticles with Nd<sup>3+</sup>

### Doping: Structural, Biological, and Machine Learning Insights

Oscar Ceballos-Sanchez<sup>a</sup>, Diego E. Navarro-López<sup>b</sup>, Jorge L. Mejía-Méndez<sup>c\*</sup>, Gildardo Sanchez-Ante<sup>b</sup>, Vicente Rodríguez-González<sup>d</sup>, Angélica Lizeth Sánchez-López<sup>b</sup>, Araceli Sanchez-Martinez<sup>\*a</sup>, Sergio M. Duron-Torres<sup>e</sup>, Karla Juarez-Moreno<sup>\*f</sup>, Naveen Tiwari<sup>\*g</sup>, Edgar R. López-Mena<sup>\*b</sup>

<sup>a</sup>Universidad de Guadalajara, Centro Universitario de Ciencias Exactas e Ingenierías (CUCEI), Departamento de Ingeniería de Proyectos, Av. José Guadalupe Zuno # 48, Industrial Los Belenes, Zapopan, Jalisco, 45157, México.

<sup>b</sup>Tecnológico de Monterrey, Escuela de Ingeniería y Ciencias, Av. Gral. Ramón Corona No 2514, Colonia Nuevo México, Zapopan, Jalisco, 45121, México.

<sup>c</sup>Departamento de Ciencias Químico-Biológicas, Universidad de las Américas Puebla, Santa Catarina Mártir s/n, 72810 Cholula, Puebla, México.

<sup>d</sup>División de Materiales Avanzados, IPICYT, Instituto Potosino de Investigación Científica y Tecnológica, San Luis Potosí, S.L.P., México.

<sup>e</sup>Unidad Académica de Ciencias Químicas, Universidad Autónoma de Zacatecas, Campus Siglo XXI, Carretera Zacatecas, Guadalajara Km 6, Ejido La Escondida, 98160, Zacatecas, México.

<sup>f</sup>Centro de Física Aplicada y Tecnología Avanzada (CFATA), Universidad Nacional Autónoma de México (UNAM), Querétaro, QRO 76230, México

<sup>g</sup>Centro Singular de Investigación en Química Biológica y Materiales Moleculares (CIQUS), C/ Jenaro de la Fuente s/n, Campus Vida, Universidad de de Santiago de Compostela, 15782 Santiago de Compostela, España.

**Table 1.** Structural parameters of the prepared NPs.

| Sample | $d_{hkl}$ (nm) | $2(\theta)$ | FWHM  | $D$ (nm) | $a$ (nm) |
|--------|----------------|-------------|-------|----------|----------|
| CN0    | 0.310          | 28.67       | 0.300 | 27.33    | 0.5261   |
| CN1    | 0.311          | 28.66       | 0.313 | 26.20    | 0.5263   |
| CN5    | 0.312          | 28.62       | 0.343 | 23.90    | 0.5270   |
| CN10   | 0.312          | 28.58       | 0.445 | 18.42    | 0.5277   |

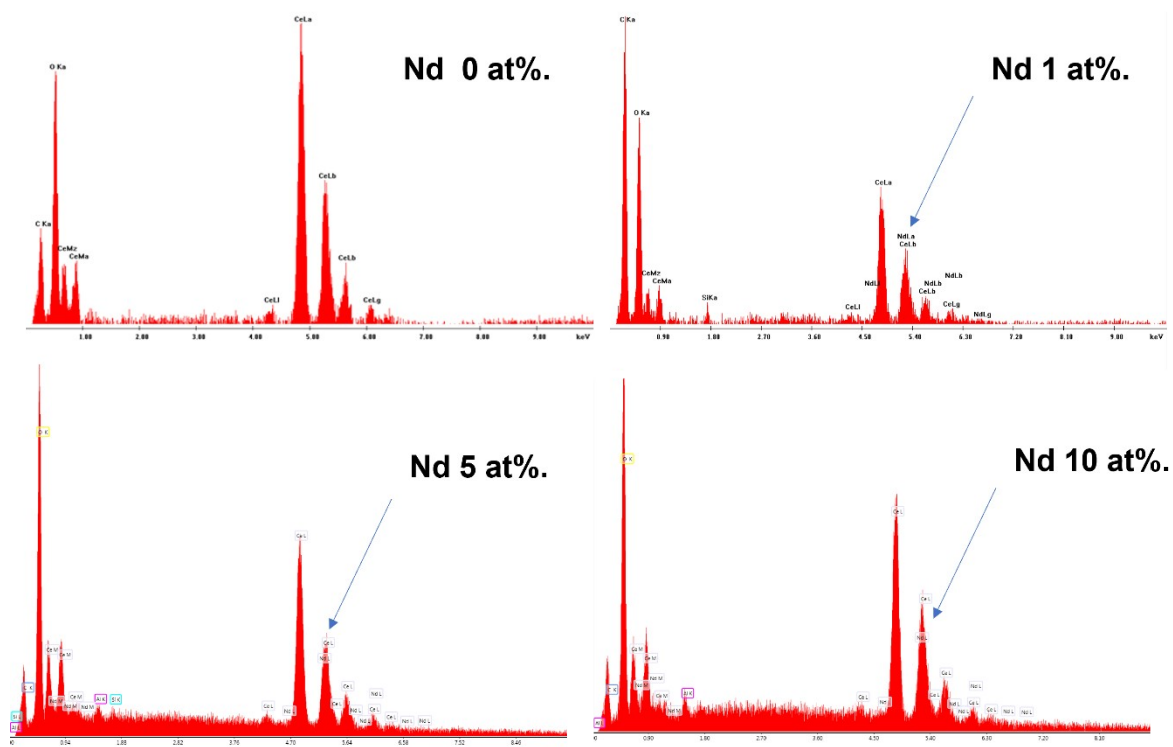

**Figure S1.** EDS spectrum of Nd-CeO<sub>2</sub> nanoparticles with different amounts of Nd.

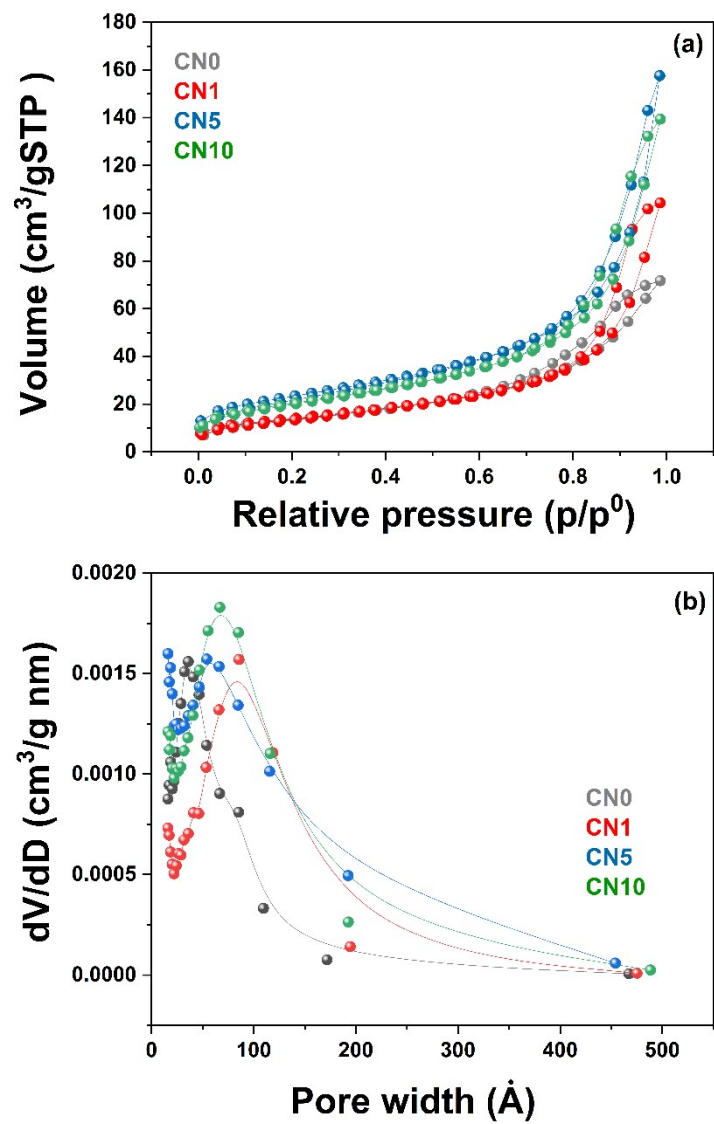

**Figure S2.** a) N<sub>2</sub>-adsorption-desorption isotherm plots, b) pore size distribution of Nd-doped CeO<sub>2</sub> nanoparticles.

**Table 2.**  $S_{\text{BET}}$ , pore volume, and pore radius of prepared CeO<sub>2</sub>-NPs.

| Sample | $S_{\text{BET}}$ (m <sup>2</sup> /g) | Pore volume (cc/g) | Pore radius (Å) |
|--------|--------------------------------------|--------------------|-----------------|
| CN0    | 49.240                               | 0.106              | 35.824          |
| CN1    | 50.004                               | 0.157              | 85.610          |
| CN5    | 83.815                               | 0.233              | 16.057          |
| CN10   | 73.258                               | 0.208              | 66.815          |

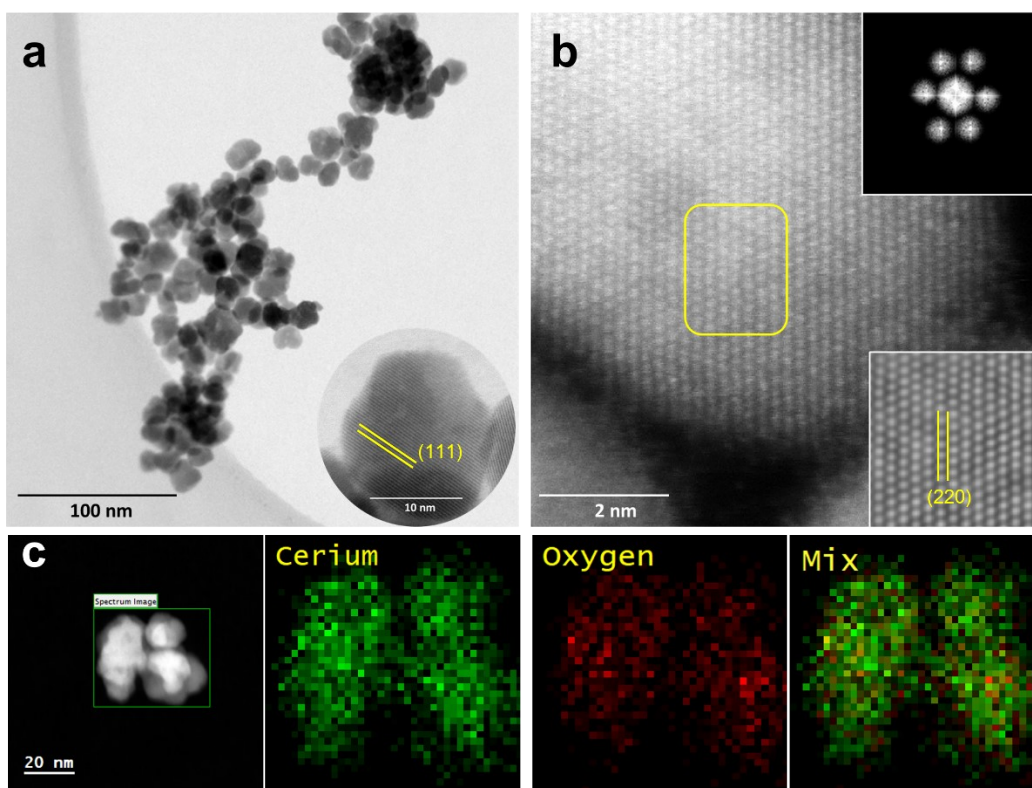

**Figure S3.** a) TEM/HRTEM image, b) STEM-HAADF image (inset is the inverse FFT), and c) EDS elemental mapping of CeO<sub>2</sub>.

TEM/HRTEM image of CeO<sub>2</sub> (**Figure S3**) depicts that the nanoparticles are consistent with the observed morphology. 17.25 nm was determined to be the average particle size. The (fast-Fourier Transform) FFT and inverse FFT were utilized to analyze the interplanar distance ( $d_{hkl}$ ) of 0.31 nm, leading to the identification of the (111) plane, as seen in the HRTEM inset. The surface's HRTEM picture in HAADF-STEM mode is shown in **Figure S3b**. In relation to the (220) plane, the  $d_{hkl}$  value is 0.19 nm. Cerium and oxygen are represented by a homogeneous distribution in **Figure S3c** spectrum picture and elemental mapping. It also displays a blend of elemental mapping.
